# Supplementary material for: Neurological assessment of preterm infants for predicting neuromotor status at 2 years: results from the LIFT cohort
Source: HighWire-hosted journal article supplement (doi:10.1136/bmjopen-2012-002431), 2013-01-01

# CHU de Nantes - Service de Néonatalogie

Médecin

demandeur : MIGRAINE / ROZE

Date : 26 avril 2011

Plan d'ensemble :

Encadrer la zone à photographier

Gros plan :

Mettre une croix sur le détail lésionnel

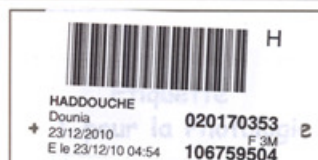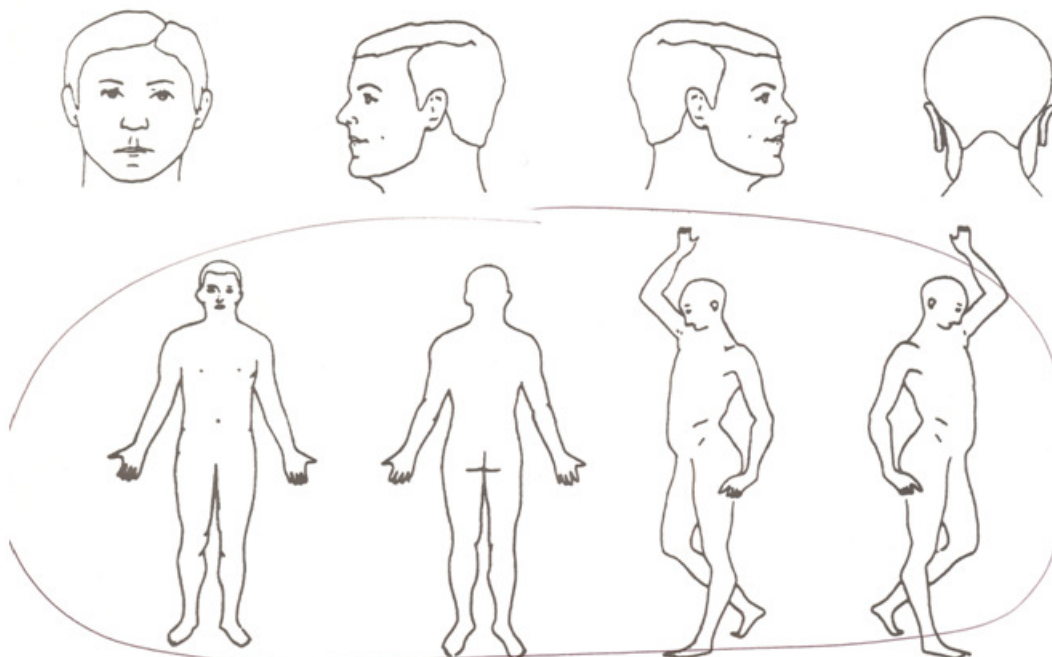

## NOTE D'INFORMATION

L'original du bon reste dans le service,  
la copie est destinée à la Photologie

Vous êtes pris(e) en charge par l'équipe médicale du CHU de Nantes.

L'étude et le suivi de votre dossier nécessitent des photographies. Nous sollicitons votre autorisation pour la prise de ces clichés et le cas échéant leur exploitation rendue anonyme.

J'autorise le Dr MIGRAINE du CHU de Nantes à réaliser des photographies et à les utiliser pour :

- Le suivi médical
- L'enseignement
- La publication dans une revue ou sur un site médical sans possibilité d'identification

Date : 26/04/2011

Signature de l'intéressé(e)  
ou ayant droit

Signature du Médecin

Service de PHOTOLOGIE : 1<sup>er</sup> étage - Aile Ouest  
de 8 h 30 à 13 h et de 14 h à 17 h

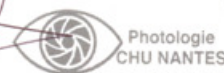

Supplement: bmjopen-2012-002431supp.pdf [file bmjopen-2012-002431supp.pdf]
